# Supplementary material
Source: PubMed Central journal article supplement (PMC3625947)
Supplement: NIHMS452111-supplement-Supplemental_information.pdf [file NIHMS452111-supplement-Supplemental_information.pdf]

*Supramolecular protein cage composite MR contrast agents with extremely efficient relaxivity properties*

## SUPPORTING INFORMATION

### Relaxivity Equations:<sup>1</sup>

Analytical equation containing the decay constant,  $T_1$ , for the recovery of the net nuclear spin magnetization for a sample placed in a magnetic field which has been tilted out of equilibrium:

$$M_z(t) = M_{z \text{ Equilibrium}} \left( 1 - e^{-\frac{t}{T_1}} \right)$$

- $M_z(t)$  nuclear spin magnetization in the z axis at time  $t$  in units of seconds
- $M_{z \text{ Equilibrium}}$  equilibrium state of the nuclear spin magnetization in the z axis (maximum magnetization)
- $T_1$  decay constant for the recovery of spin in units of seconds

Observed  $T_1$  of a specific sample type with a contrast agent present:

$$T_{1 \text{ observed}} = \left[ \frac{1}{T_{1 \text{ sample}}} + (r_1)[\text{Contrast Agent}] \right]^{-1}$$

- $r_1$  relaxivity of a contrast agent in units of  $\text{mM}^{-1} \text{ seconds}^{-1}$
- $[\text{Contrast Agent}]$  concentration of the contrast agent in units of mM

### Solomon-Bloembergen-Morgan (SBM) model for PRE:

Relaxivity of contrast agent including the dipolar, scalar and Curie relaxation mechanisms:

$$r_1 = \frac{q \cdot [\text{Contrast Agent}]}{[\text{Water}]} \left[ \frac{1}{T_{1M} + \tau_M} \right]$$

$$r_1 = \frac{q \cdot [Constrast Agent]}{[Water]} \left[ \frac{1}{\left( \frac{1}{T_{1M}^{dipolar}} + \frac{1}{T_{1M}^{scalar}} + \frac{1}{T_{1M}^{currie}} \right)^{-1} + \tau_M} \right]$$

$[Water]$  = 55.6 Molar

concentration of water in units of (moles / liter), (fixed value)

$q$

number of inner sphere waters that bind to the Gd ion, (fitting parameter)

$T_{1M}^{dipolar}$

dipolar contribution to the relaxation time

$T_{1M}^{scalar}$

scalar contribution to the relaxation time

$T_{1M}^{currie}$

Currie contribution to the relaxation time

$\tau_M$

residence time for the Gd bound water molecule, (fitting parameter)

Relaxivity of contrast agent considering only the dipolar relaxation mechanism (the dipolar mechanism was only considered in the fitting of the NMRD profiles in this work):

$$r_1 = \frac{q \cdot [Constrast Agent]}{[Water]} \left[ \frac{1}{T_{1M}^{dipolar} + \tau_M} \right]$$

SBM analytical description of the dipolar relaxation time:

$$T_{1M}^{dipolar} = \frac{2C_{dd}}{15r_{IS}^6} [3J(\omega_I, \tau_{d1}) + 7J(\omega_S, \tau_{d2})]$$

Prefactor for relaxation:

$$C_{dd} = \gamma_I^2 \gamma_S^2 \hbar^2 S(S+1) \left( \frac{\mu_0}{4\pi} \right)^2$$

$\gamma_I = 2.675 \cdot 10^8$

nuclear gyromagnetic ratio (second<sup>-1</sup> Tesla<sup>-1</sup>)

$\gamma_S = -1.760859778 \cdot 10^{11}$

electronic gyromagnetic ratio (second<sup>-1</sup> Tesla<sup>-1</sup>)

$\hbar = 1.054571628 \cdot 10^{-34}$

Planck constant (Joules · seconds)

$S = 7/2$

spin quantum number for the Gd<sup>3+</sup> ion

$\mu_0 = 4\pi \cdot 10^{-7}$

magnetic permeability of free space (Newton · Amps<sup>-2</sup>)

$$r_{IS}^6 = 3 \cdot 10^{-10}$$

distance between the nuclear and the electronic spin (meters), (fixed value)

Spectral density function:

$$J(\omega, \tau) = \frac{\tau}{1 + \omega^2 \tau^2}$$

$\omega$

Larmor frequency of nuclear or electric spin

$\tau$

correlation time where  $\tau$  is either  $\tau_{d1}$  or  $\tau_{d2}$

Correlation times in units of seconds:

$$\tau_{d1} = \left( \frac{1}{\tau_R} + \frac{1}{\tau_M} + \frac{1}{T_{1e}} \right)^{-1}$$

and

$$\tau_{d2} = \left( \frac{1}{\tau_R} + \frac{1}{\tau_M} + \frac{1}{T_{2e}} \right)^{-1}$$

$\tau_R$

rotational correlation time for the Gd ion, (fitting parameter)

$T_{1e}$

longitudinal electronic relaxation rate

$T_{2e}$

transverse electronic relaxation rate

Electronic relaxation time (longitudinal and transverse) in units of seconds:

$$T_{1e} = \left[ \frac{2\Delta^2}{50} (4S(S+1) - 3) \left( \frac{\tau_v}{1 + \omega_S^2 \tau_v^2} + \frac{4\tau_v}{1 + 4\omega_S^2 \tau_v^2} \right) \right]^{-1}$$

and

$$T_{2e} = \left[ \frac{\Delta^2}{50} (4S(S+1) - 3) \left( 3\tau_v + \frac{5\tau_v}{1 + \omega_S^2 \tau_v^2} + \frac{2\tau_v}{1 + 4\omega_S^2 \tau_v^2} \right) \right]^{-1}$$

$$\tau_v = 1.4 \cdot 10^{-11}$$

correlation time for instantaneous distortions of the metal complex polyhedron in units of seconds, (fixed value in the SBM fit)

$$\Delta^2 = 9 \cdot 10^{18}$$

mean square fluctuation of the zero-field splitting in units of seconds<sup>-2</sup>, (fixed value in the SBM fit)

Fitting scheme:

- 1) Four fitting parameters were used ( $\tau_R$ ,  $\tau_M$ ,  $\tau_V$  and  $\Delta$ ) to individually fit all twenty NMRD profiles while  $q$  was held at a value of 1 in these SBM fits. (20 profiles result from 2 preparations for both non-passivated and passivated batches for G0.0, G0.5, G1.5, G2.5 G3.5) Next average values for  $\tau_V$  and  $\Delta$  were calculated from the 20 individually fit profiles. This resulted in:  $\Delta = 3.0 \cdot 10^9 \pm 0.3 \cdot 10^9$  and  $\tau_V = 1.4 \cdot 10^{-11} \pm 0.2 \cdot 10^{-11}$ .
- 2) The average values for  $\tau_V$  and  $\Delta$  were used to fit the averaged NMRD profile (all twenty data sets averaged) with  $q$ ,  $\tau_R$  and  $\tau_M$  all set as fitting parameters. The individual NMRD profiles were also fit in this manner.

### Details on the construction of the branched polymer modeled into the Hsp structure:

| Generation | Volume addition at each gen (A <sup>3</sup> ) | Total volume added | % interior occupied | Added groups                                              |
|------------|-----------------------------------------------|--------------------|---------------------|-----------------------------------------------------------|
| G0.0       | 1332                                          | 2664               | 1.3%                | 24 bromo alkynes                                          |
| G0.5       | 1568                                          | 5800               | 2.8%                | 24 diazido amines                                         |
| G0.5 DTPA  | 5542                                          | 16884              | 8.3%                | 24 DTPA(Gd)s                                              |
| G1.0       | 723                                           | 18330              | 9.0%                | 20 total (4 are in xlinks, 16 are not xlinked) trialkynes |
| G1.5 DTPA  | 5982                                          | 30294              | 14.9%               | 20 DTPA(Gd)s                                              |

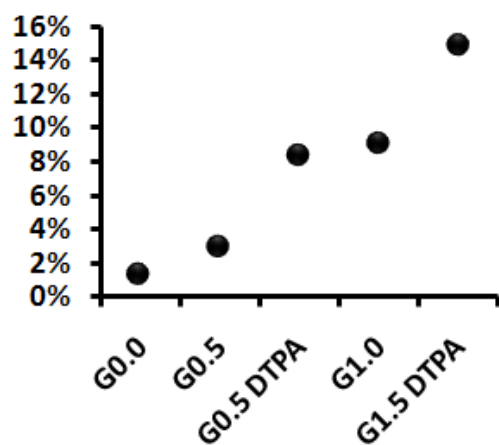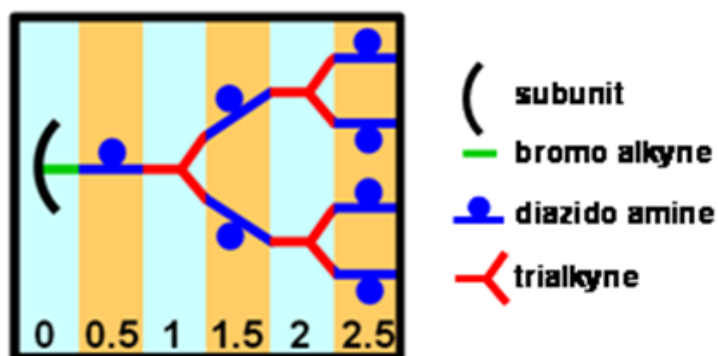

### Protein and Gd quantitation:

A BCA Protein Assay (bicinchoninic acid) from Pierce was used to quantitate the protein (HSP) concentration ([www.piercenet.com](http://www.piercenet.com)) and the protocol provided by Pierce was used. Protein samples were analyzed in triplicate resulting in an average relative standard deviation of 2.1% for the twenty samples for the BCA assay. Energy Laboratories, Inc. performed the ICP-MS quantitation of the the Gd ions ([www.energylab.com](http://www.energylab.com)).

## Comparison of protein cage – Gd based contrast agents:

| Cage / Chelator                               | Ionic $r_1$ (MHz) | Particle $r_1$      | Cage Diameter (nm) | Particle $r_1$ per volume ( $\text{sec}^{-1} \text{mM}^{-1} \text{nm}^{-3}$ ) | Particle $r_1$ per mass <sup>2</sup> ( $\text{L g}^{-1} \text{sec}^{-1}$ ) | Clinically relevant binding | Group Reference              |
|-----------------------------------------------|-------------------|---------------------|--------------------|-------------------------------------------------------------------------------|----------------------------------------------------------------------------|-----------------------------|------------------------------|
| CCMV / endogenous binding site                | 202 (62)          | 28,482 <sup>a</sup> | 28                 | 2.5                                                                           | 7.8                                                                        | No                          | Douglas / Young <sub>3</sub> |
| CCMV / metal binding peptide – genetic fusion | 210 (62)          | 36,120 <sup>a</sup> | 28                 | 3.1                                                                           | 9.9                                                                        | No                          | Douglas / Young <sub>4</sub> |
| MS2 / DTPA-ITC                                | 16.9 (64)         | 7,200               | 27                 | 0.7                                                                           | 2.9                                                                        | Yes                         | Kirshenbaum <sub>5</sub>     |
| CPMV / DOTA-click                             | 15.5 (64)         | 4,150               | 30                 | 0.3                                                                           | 1.1                                                                        | Yes                         | Finn <sub>6</sub>            |
| CCMV / DOTA-NHS ester                         | 46 (62)           | 2,806               | 28                 | 0.2                                                                           | 0.8                                                                        | Yes                         | Douglas / Young <sub>4</sub> |
| MS2 / bis(HOPO)-TAM                           | 31 (60)           | 2,900               | 27                 | 0.3                                                                           | 1.2                                                                        | Yes                         | Francis <sub>7,8</sub>       |
| HSP-BP-DTPA-Gd                                | 19 (62)           | 3,450               | 14                 | 2.4                                                                           | 8.7                                                                        | Yes                         | Douglas / Young this work    |
| DTPA-Gd                                       | 4 (20)            | 4                   |                    | 12.2                                                                          | 7.3                                                                        | Yes                         | <sup>9</sup>                 |

## NMRD profile and SBM fit of generations G0.0, G0.5, G1.5, G2.5 and G3.5:

Four experimental data points are averaged for all points in the plots below. These four points are comprised of two points from the passivated preparations and two from the non-passivated preparations. The error bars are plus and minus one standard deviation.

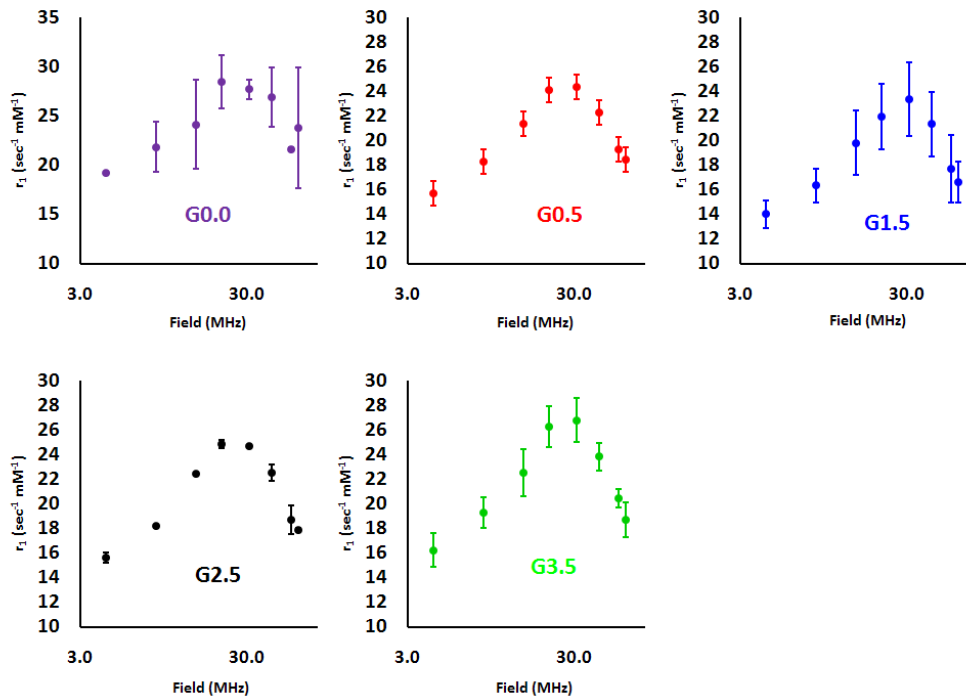

**Einstein Stokes relation to estimate the rotational correlation time of HSP in water at 20 °C:**

$$\tau_R = \frac{4\pi\eta r^3}{3kT}$$

$\tau_R$  = rotational correlation time (seconds)

$\eta$  = Viscosity of water ( water @ 20 °C = 0.001002 Pa sec = 0.001002 kg m<sup>-1</sup> sec<sup>-1</sup>)

$r$  = radius of the particle (Hsp = 6nm = 6 · 10<sup>-9</sup> m)

$k$  = boltzman constant (1.3806504 · 10<sup>-23</sup> kg m<sup>2</sup> sec<sup>-2</sup> K<sup>-1</sup>)

$K$  = temperature in Kelvin

$$=(4*\text{PI}()*0.001002*(6*10^{-9})^3)/(3*(1.38*10^{-23})*296) = 2.2 * 10^{-7}$$

$$=(\text{kg m}^{-1} \text{ sec}^{-1}*(\text{m})^3) / ((\text{kg m}^2 \text{ sec}^{-2} \text{ K}^{-1})*\text{K}) = \text{seconds}$$

**Relationship of  $r_1$  and  $\tau_R$  determined by the SBM model with  $q = 1.1$ ,  $\tau_M = 5.6 \times 10^{-7}$  seconds and the magnetic field = 31MHz (0.73 Tesla):**

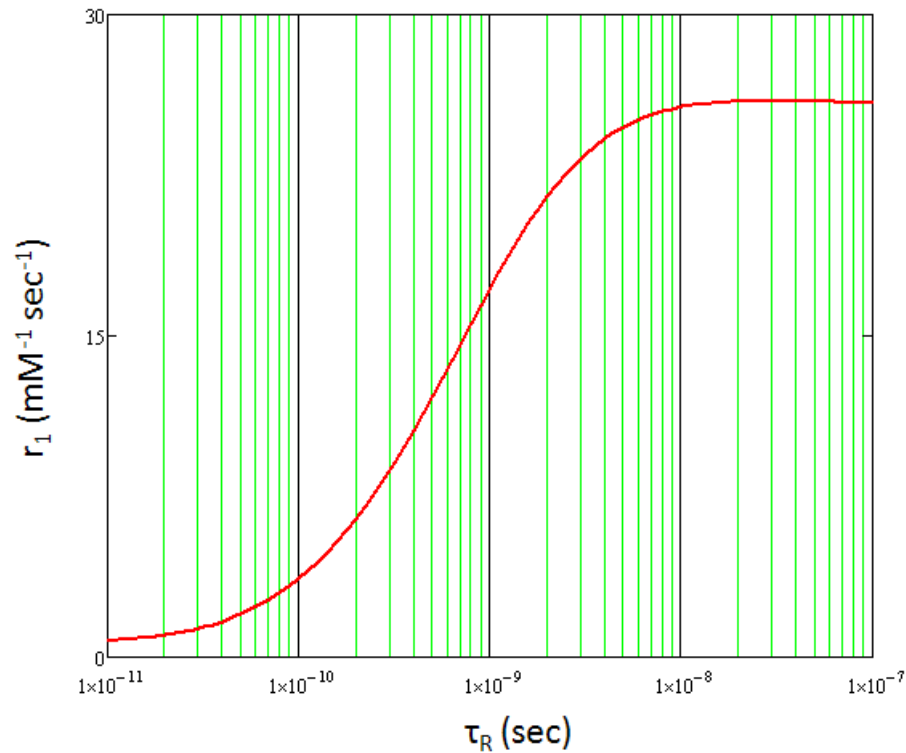

---

**Peak shift in MHz for the peak located at approximately 31MHz:**

Four experimental data points are averaged for the points below. These four points are comprised of two points from the passivated preparations and two from the non-passivated preparations. The error bars are plus and minus one standard deviation.

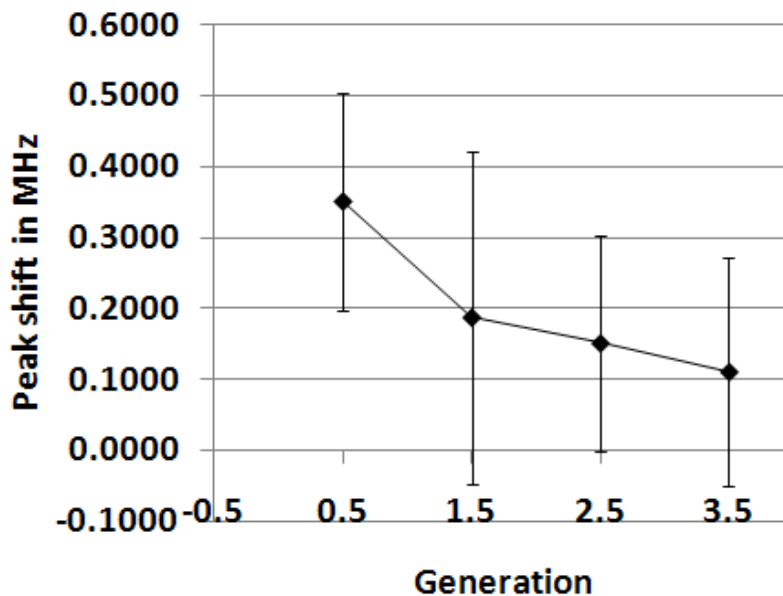

## Plots of $r_1$ vs. temperature for G0.5, G1.5, G2.5 and G3.5:

Four experimental data points are averaged for the points below. These four points are comprised of two points from the passivated preparations and two from the non-passivated preparations.

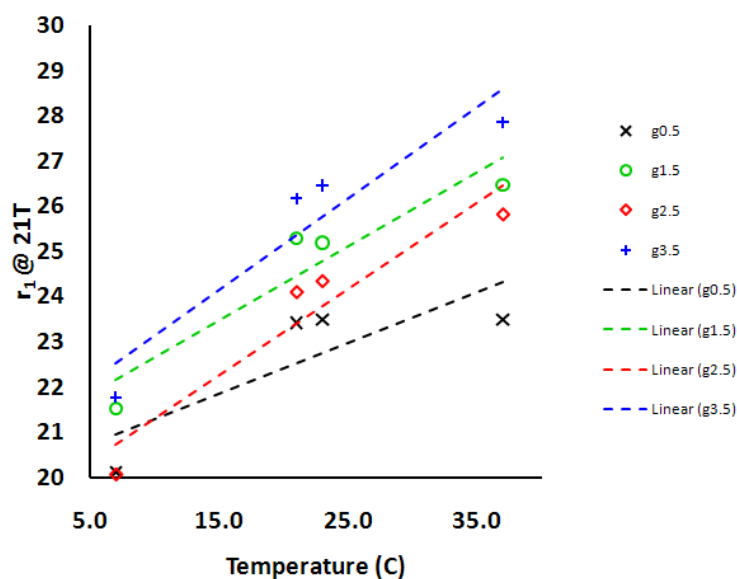

1. Helm, L., Relaxivity in paramagnetic systems: Theory and mechanisms. *Progress in Nuclear Magnetic Resonance Spectroscopy* **2006**, *49* (1), 45-64.
2. Livramento, J. B.; Helm, L.; Sour, A.; O'Neil, C.; Merbach, A. E.; Toth, E., A benzene-core trinuclear GdIII complex: towards the optimization of relaxivity for MRI contrast agent applications at high magnetic field. *Dalton Trans* **2008**, (9), 1195-202.
3. Allen, M.; Bulte, J. W. M.; Liepold, L.; Basu, G.; Zywicke, H. A.; Frank, J. A.; Young, M.; Douglas, T., Paramagnetic viral nanoparticles as potential high-relaxivity magnetic resonance contrast agents. *Magnet Reson Med* **2005**, *54* (4), 807-812.
4. Liepold, L.; Anderson, S.; Willits, D.; Oltrogge, L.; Frank, J. A.; Douglas, T.; Young, M., Viral capsids as MRI contrast agents. *Magn Reson Med* **2007**, *58* (5), 871-9.
5. Anderson, E. A.; Isaacman, S.; Peabody, D. S.; Wang, E. Y.; Canary, J. W.; Kirshenbaum, K., Viral nanoparticles donning a paramagnetic coat: conjugation of MRI contrast agents to the MS2 capsid. *Nano letters* **2006**, *6* (6), 1160-4.
6. Prasuhn, D. E., Jr.; Yeh, R. M.; Obenaus, A.; Manchester, M.; Finn, M. G., Viral MRI contrast agents: coordination of Gd by native virions and attachment of Gd complexes by azide-alkyne cycloaddition. *Chemical communications (Cambridge, England)* **2007**, (12), 1269-71.
7. Datta, A.; Hooker, J. M.; Botta, M.; Francis, M. B.; Aime, S.; Raymond, K. N., High relaxivity gadolinium hydroxypyridonate-viral capsid conjugates: nanosized MRI contrast agents. *Journal of the American Chemical Society* **2008**, *130* (8), 2546-52.
8. Hooker, J. M.; Datta, A.; Botta, M.; Raymond, K. N.; Francis, M. B., Magnetic resonance contrast agents from viral capsid shells: a comparison of exterior and interior cargo strategies. *Nano letters* **2007**, *7* (8), 2207-10.
9. Powell, D. H.; Dhuhghaill, O. M. N.; Pubanz, D.; Helm, L.; Lebedev, Y. S.; Schlaepfer, W.; Merbach, A. E., Structural and Dynamic Parameters Obtained from <sup>17</sup>O NMR, EPR, and NMRD Studies of Monomeric and Dimeric Gd<sup>3+</sup> Complexes of Interest in Magnetic Resonance Imaging: An Integrated and Theoretically Self-Consistent Approach<sup>1</sup>. *Journal of the American Chemical Society* **1996**, *118* (39), 9333-9346.
